# Supplementary material for: Differential effects of extreme drought on production and respiration: synthesis and modeling analysis
Source: Copernicus journal article supplement (doi:10.5194/bg-11-621-2014), 2014-02-04
Supplement: Supplementary file [file bg-11-621-2014-supplement.pdf]

## 1 Supplemental Material

### 2 **Table S1** Literature review of differential responses of production and respiration to drought in field observations and manipulative 3 experiments across different biomes

| Site                               | Biome type                                                    | Results                                                                                                                                                                                                                             | Mechanisms                                                                                                                                                                                                                  | Reference            | Note      |
|------------------------------------|---------------------------------------------------------------|-------------------------------------------------------------------------------------------------------------------------------------------------------------------------------------------------------------------------------------|-----------------------------------------------------------------------------------------------------------------------------------------------------------------------------------------------------------------------------|----------------------|-----------|
| European forests and one grassland | Pine, oak, beech, spruce, fir, juniper, and grassland         | In most sites, extreme drought induced more reduction in GPP than ER except a few Mediterranean ecosystems where the drought effect was smaller for GPP than ER                                                                     | Not specified                                                                                                                                                                                                               | Ciais et al., 2005   | Eddy flux |
| East coast of japan                | Temperate evergreen and deciduous broadleaved tree            | GPP was reduced more than ER                                                                                                                                                                                                        | Not specified                                                                                                                                                                                                               | Kosugi et al., 2005  | Eddy flux |
| Saskatchewan Canada                | Southern boreal forests including aspen, spruce and jack pine | In aspen, first-year drought suppressed ER, but enhanced GPP whereas second- and third-year drought reduced GPP and ER with more reduction in GPP; In spruce and jack pine forests, drought did not significant affected GPP and ER | The enhanced GPP in aspen was due to warmer spring in that year; the lack of response to drought in the two coniferous forests was because of summer rainfall, low topographic position and low soil water holding capacity | Kljun et al., 2006   | Eddy flux |
| European forests                   | Beech, Douglas-fir, Scots pine, Spruce, mixed coniferous      | Drought inhibited GPP greater than ER                                                                                                                                                                                               | Not specified                                                                                                                                                                                                               | Granier et al., 2007 | Eddy flux |
| Hungaria                           | Semi-arid sandy grassland                                     | Drought is more effective in reducing plant CO <sub>2</sub> uptake than in reducing ER                                                                                                                                              | Uncoupled heterotrophic respiration to photosynthesis is more resistant to drought                                                                                                                                          | Nagy et al., 2007    | Eddy flux |
| Southern Portugal                  | Evergreen oak woodland, grassland, and eucalyptus plantation  | Severe drought affected more GPP than ER                                                                                                                                                                                            | Not specified                                                                                                                                                                                                               | Pereira et al., 2007 | Eddy flux |

---

|                                    |                                                                               |                                                                                                               |                                                                                                                      |                       |                          |
|------------------------------------|-------------------------------------------------------------------------------|---------------------------------------------------------------------------------------------------------------|----------------------------------------------------------------------------------------------------------------------|-----------------------|--------------------------|
| Interior Alaska, USA               | Black spruce and aspen                                                        | GPP was reduced in the two forests, but ER increased                                                          | Drought-associated temperature increase might cause ER to rise                                                       | Welp et al., 2007     | Eddy flux                |
| Northwest Ohio, USA                | Oak and red maple                                                             | Greater suppression of GPP than of ER by drought                                                              | Drought caused lower leaf area, lower apparent quantum yield and lower canopy conductance                            | Noormets et al., 2008 | Eddy flux                |
| Global network of eddy flux towers | Grassland, forest, shrubland, wetland, savannas                               | Overall, production is 50% more sensitive than respiration to drought, with a few exceptions                  | Not specified                                                                                                        | Schwalm et al., 2010a | Eddy flux                |
| Kendall grassland, USA             | Semi-desert grassland                                                         | Drought reduced more gpp than ER                                                                              | Not specified                                                                                                        | Scott et al., 2010    | Eddy flux                |
| Southern Portugal                  | semi-natural Mediterranean grassland                                          | Drought reduced GPP more than ER                                                                              | Not specified                                                                                                        | Jongen et al., 2011   | Eddy flux                |
| Western North America              | Grassland, evergreen needle forest (ENF), woody savannas                      | GPP of grassland and ENF were more sensitive to drought, whereas in woody savannas GPP was less sensitive     | Not specified                                                                                                        | Schwalm et al., 2012  | Eddy flux                |
| Inner-Mongolia, China              | Arid grassland                                                                | GPP was more sensitive to seasonal drought than ER                                                            | None but suggested drought might have lasted longer for assimilation than respiration in this ecosystem              | Yang and Zhou, 2013   | Eddy flux                |
| Southwestern US                    | Ponderosa pine and grassland                                                  | GPP was more sensitive to summer drought than ER in the forest, but less sensitive in the grassland/shrubland | Not specified                                                                                                        | Kolb et al., 2013     | Eddy flux                |
| France                             | Mediterranean evergreen oak forest                                            | Drought inhibited GPP greater than ER                                                                         | Shallow soil water content was not strongly affected by drought and thus soil respiration was less affected than GPP | Misson et al., 2010   | Manipulative experiment  |
| Wyoming, USA                       | High Plains Grassland                                                         | GPP was more sensitive to reduced rainfall than ER                                                            | Not specified                                                                                                        | Chimner et al., 2010  | Manipulative experiments |
| Northern Arizona                   | Desert grassland, pinyon-juniper, ponderosa pine forest, mixed conifer forest | Precipitation reduction did not impact both GPP and ER                                                        | Not specified                                                                                                        | Wu et al., 2011       | Manipulative experiments |
| Cairngorms, Scotland               | Grassland                                                                     | Drought reduced more reduction in GPP than in ER                                                              | Not specified                                                                                                        | Johnson et al., 2011  | Manipulative experiment  |
| Southern California                | Coastal grassland                                                             | Imposed drought reduced GPP more than ER                                                                      | Not specified                                                                                                        | Potts et al., 2012    | Manipulative experiment  |

---

**Table S2** Results (p values) of paired-sample T test in reduction of C variable ( $\Delta$ NPP,  $\Delta$ Rh,  $\Delta$ NEE,  $\Delta$ Soil C) between the two drought types (even size reduction and reduced event number) in the four grassland sites

| Sites  | Konza | Hays  | Cheyenne | Sevilleta |
|--------|-------|-------|----------|-----------|
| NPP    | 0     | 0     | 0        | 0         |
| Rh     | 0     | 0     | 0        | 0         |
| NEE    | 0     | 0.044 | 0.098    | 0.412     |
| Soil C | 0     | 0     | 0        | 0         |

**Table S3** Slopes of the linear regression between rainfall and C variables (NPP, Rh, and NEE) in each of three rainfall scenarios, and the significance (p) in slope difference between ambient and rainfall treatments. “-” means not applicable.

|                  | Sites              | Konza  |        | Hays   |        | Cheyenne |        | Sevilleta |        |
|------------------|--------------------|--------|--------|--------|--------|----------|--------|-----------|--------|
|                  | Rainfall scenarios | Slopes | p      | Slopes | p      | Slopes   | p      | Slopes    | p      |
| Rainfall vs. NPP | Ambient            | 0.16   | -      | 0.27   | -      | 0.15     | -      | 0.24      | -      |
|                  | ESR                | 0.46   | 0.002  | 0.48   | 0.0016 | 0.23     | 0.0646 | 0.75      | <.0001 |
|                  | REN                | 0.55   | 0.0001 | 0.5    | 0.0011 | 0.23     | 0.0858 | 0.46      | <.0001 |
| Rainfall vs. Rh  | Ambient            | 0.04   | -      | 0.06   | -      | 0.04     | -      | 0.07      | -      |
|                  | ESR                | -      | -      | -      | -      | -        | -      | -         | -      |
|                  | REN                | -      | -      | -      | -      | -        | -      | -         | -      |
| Rainfall vs. NEE | Ambient            | -0.14  | -      | -0.25  | -      | -0.12    | -      | -0.21     | -      |
|                  | ESR                | -0.56  | 0.0005 | -0.45  | 0.0076 | -0.23    | 0.0443 | -0.85     | <.0001 |
|                  | REN                | -0.63  | <.0001 | -0.48  | 0.0028 | -0.23    | 0.0309 | -0.55     | 0.001  |

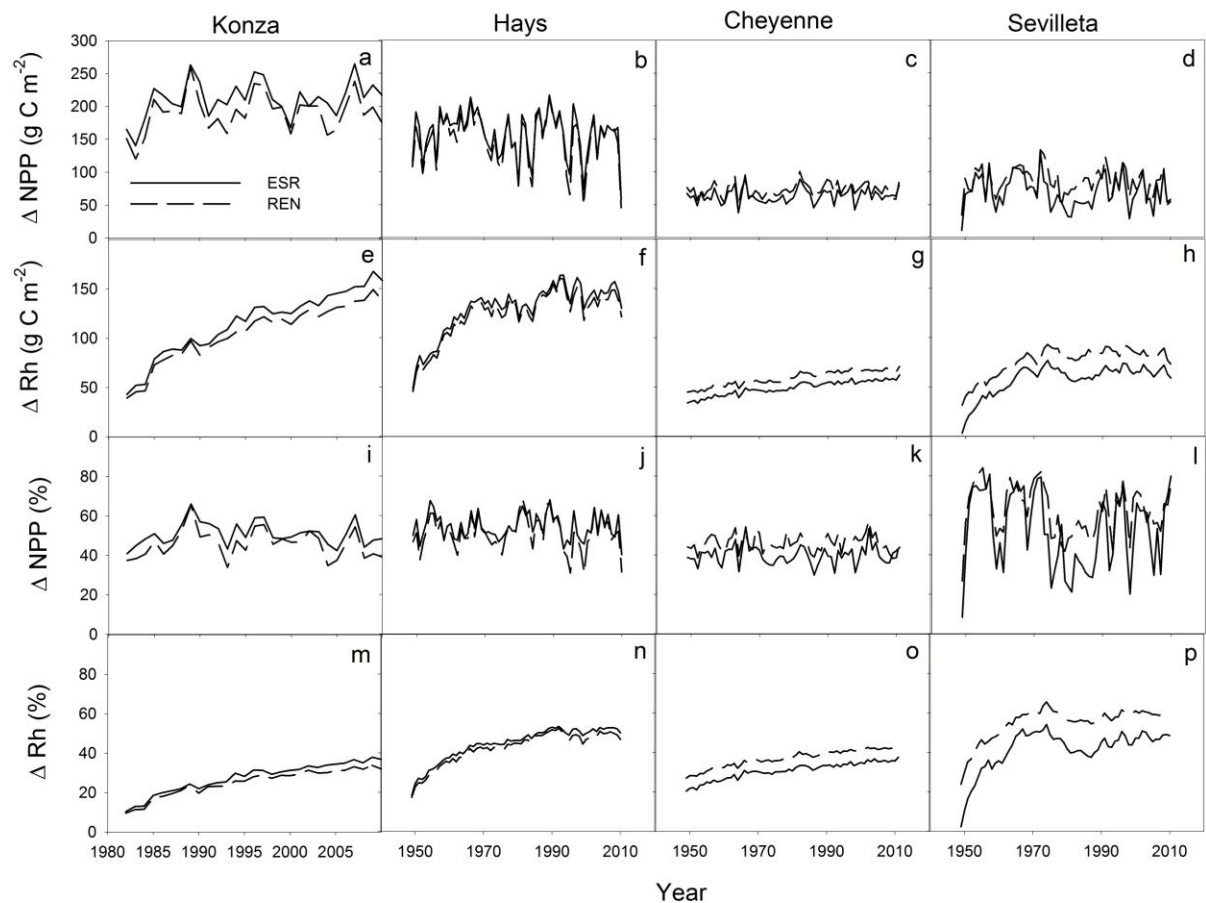

**Figure S1** Drought-induced reductions in NPP and Rh along modeled years in four North American grasslands (Konza: a, e, i and m; Hays: b, f, j and n; Cheyenne: c, g, k and o; Sevilleta: d, h, l and p). ESR is rainfall event size reduction and REN is reduced rainfall event number. Solid line represents ESR treatment and dash line represents REN treatment.

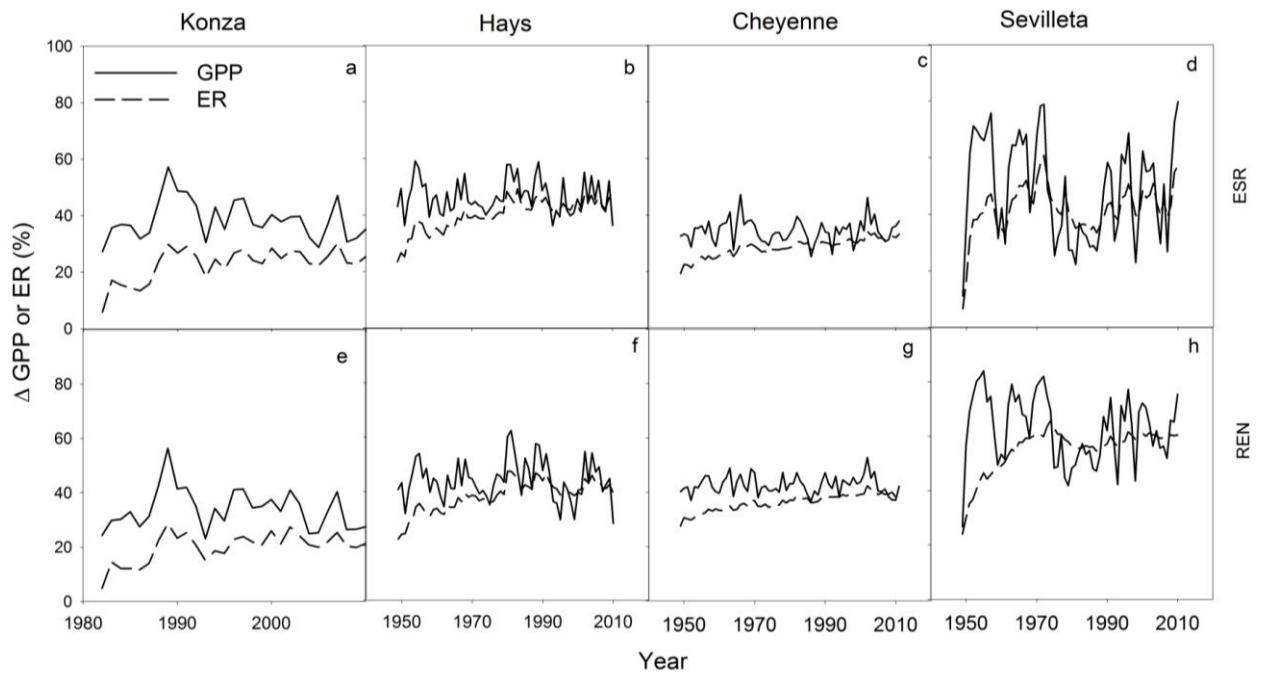

**Figure S2** Drought-induced reductions in GPP and ER along modeled years in four North American grasslands (Konza: a and e; Hays: b and f; Cheyenne: c and g; Sevilleta: d and h). ESR is rainfall event size reduction and REN is reduced rainfall event number. Solid line represents GPP and dash line represents ER.
